# Supplementary material for: Synthesis of ZnS/CuS nanospheres loaded on reduced graphene oxide as high-performance photocatalysts under simulated sunlight irradiation
Source: Royal Society of Chemistry journal article supplement (doi:10.1039/c7nj00801e), 2017-01-01
Supplement: c7nj00801e1.pdf [file c7nj00801e1.pdf]

## Supporting Information

**Journal: New Journal of Chemistry**

### **Synthesis of ZnS/CuS nanospheres loaded on reduced graphene oxide as high-performance photocatalysts under simulated sunlight irradiation**

**Liu Yang<sup>a</sup>, Xin Guan<sup>b</sup>, Guang-Sheng Wang<sup>c</sup>, Xiao-Hui Guan<sup>a\*</sup> and Bo Jia<sup>d</sup>**

<sup>a</sup> School of Chemical Engineering, Northeast Electric Power University, Jilin 132000, PR China.  
guanxh@neepu.edu.cn

<sup>b</sup> Lyon University, Lyon Institute of Nanotechnology- UMR 5270 – CNRS, Ecole Centrale de Lyon,  
36 avenue Guy de Collongue, F-69134 Ecully Cedex, France.

<sup>c</sup> Key Laboratory of Bio-Inspired Smart Interfacial Science and Technology of Ministry of  
Education, School of Chemistry and Environment, Beihang University, Beijing 100191, PR China.

<sup>d</sup> State Grid Xinjiang Electric Power Research Institute, Xinjiang 830011, PR China.

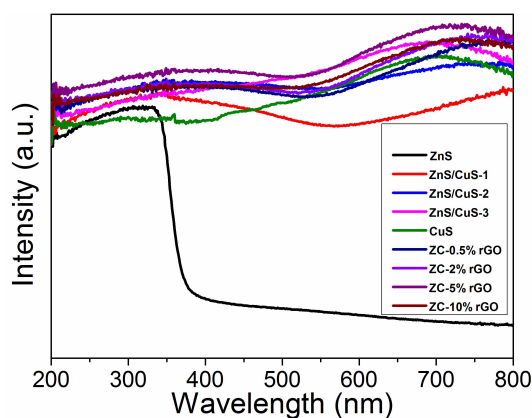

**Fig. S1.** UV-vis diffuse reflectance spectra of ZnS, ZnS/CuS-1, ZnS/CuS-2, ZnS/CuS-3, CuS,  
ZC-0.5%rGO, ZC-2%rGO, ZC-5%rGO and ZC-10%rGO.

Table S1. The adsorption efficiency of as-synthesized nanomaterials

| Nanomaterials                                            | Adsorption rate for EB (%) | Adsorption rate for MB (%) |
|----------------------------------------------------------|----------------------------|----------------------------|
| Adsorption for EB and MB in the individual dye solutions |                            |                            |
| ZnS                                                      | 3.28                       | 5.89                       |
| ZnS/CuS-1                                                | 2.10                       | 13.10                      |
| ZnS/CuS-2                                                | 1.38                       | 12.87                      |
| ZnS/CuS-3                                                | 1.73                       | 10.75                      |
| CuS                                                      | 1.34                       | 12.13                      |
| ZC-5%rGO                                                 | 4.48                       | 14.08                      |
| ZC-10%rGO                                                | 8.13                       | 18.75                      |
| Adsorption for EB and MB in the mixed dye solutions      |                            |                            |
| ZnS/CuS-3                                                | 4.20                       | 14.92                      |
| ZC-0.5%rGO                                               | 4.60                       | 12.12                      |
| ZC-2%rGO                                                 | 3.85                       | 17.50                      |
| ZC-5%rGO                                                 | 11.70                      | 21.07                      |
| ZC-10%rGO                                                | 16.06                      | 23.87                      |
